# Supplementary material for: Draft genome of the sea cucumber Apostichopus japonicus and genetic polymorphism among color variants
Source: PubMed Central journal article supplement (PMC5437941; doi:10.1093/gigascience/giw006), 2017-01-07
Supplement: giw006_giga-d-16-00085_original_submission.pdf [file giw006_giga-d-16-00085_original_submission.pdf]

[Click here to view linked References](#)

1  
2 **Data note**  
3

4  
5  
6 **Draft genome of the sea cucumber *Apostichopus japonicus* and genetic**  
7 **polymorphism among color variants**  
8  
9

10  
11  
12  
13  
14  
15  
16  
17 Jihoon Jo<sup>a#</sup>, Jooseong Oh<sup>a#</sup>, Hyun-Gwan Lee<sup>b</sup>, Hyun-Hee Hong<sup>a</sup>, Sung-Gwon Lee<sup>a</sup>,  
18 Seongmin Cheon<sup>a</sup>, Elizabeth M. A. Kern<sup>c</sup>, Soyeong Jin<sup>c</sup>, Sung-Jin Cho<sup>d\*</sup>, Joong-Ki  
19 Park<sup>c\*</sup>, and Chungoo Park<sup>a\*</sup>  
20  
21  
22

23  
24 <sup>a</sup> School of Biological Sciences and Technology, Chonnam National University,  
25 Gwangju 61186, Republic of Korea  
26

27  
28 <sup>b</sup> Marine Ecological Disturbing and Harmful Organisms Research Center, Department  
29 of Oceanography, Chonnam National University, Gwangju 61186, Republic of Korea  
30

31 <sup>c</sup> Division of EcoScience, Ewha Womans University, Seoul 03760, Republic of Korea.  
32

33 <sup>d</sup> Department of Biology, College of Natural Sciences, Chungbuk National University,  
34 Cheongju, Chungbuk 28644, Republic of Korea  
35

36  
37 <sup>#</sup> These authors equally contributed this work.  
38  
39  
40  
41  
42  
43  
44  
45

46 \*Corresponding Authors.  
47

48 E-mail addresses:  
49

50 Chungoo Park, [chungoo@jnu.ac.kr](mailto:chungoo@jnu.ac.kr). Tel: +82-62-530-1913. Fax: +82-62-530-2199  
51

52 Joong-Ki Park, [jkpark@ewha.ac.kr](mailto:jkpark@ewha.ac.kr). Tel: +82-2-3277-5948. Fax: +82-2-3277-2385.  
53

54 Sung-Jin Cho, [sjchobio@chungbuk.ac.kr](mailto:sjchobio@chungbuk.ac.kr). Tel: +82-43-261-2294. Fax: +82-43-260-  
55 2298.  
56  
57  
58  
59  
60  
61  
62

1  
2  
3  
4  
5  
6  
7  
8  
9  
10  
11  
12  
13  
14  
15  
16  
17  
18  
19  
20  
21  
22  
23  
24  
25  
26  
27  
28  
29  
30  
31  
32  
33  
34  
35  
36  
37  
38  
39  
40  
41  
42  
43  
44  
45  
46  
47  
48  
49  
50  
51  
52  
53  
54  
55  
56  
57  
58  
59  
60  
61  
62  
63  
64  
65

## Abstract

**Background:** The Japanese sea cucumber (*Apostichopus japonicus* Selenka 1867) is an economically important species as a source of seafood and ingredient in traditional medicine. It is mainly found off the coasts of northeast Asia. Recently, substantial exploitation and widespread biotic disease in *A. japonicus* have generated increasing conservation concern. However, the genomic knowledge base and resources available for researchers to use in managing this natural resource and to establish genetically based breeding systems for sea cucumber aquaculture are still in a nascent stage.

**Findings:** A total of 312 gigabases (Gb) of raw sequences were generated using the Illumina HiSeq 2000 platform and assembled to a final size of 0.67 Gb which is about 81.7 % of the estimated genome size (0.82 Gb). We observed nucleotide-level heterozygosity within the assembled genome to be 0.986 %. The resulting draft genome assembly comprising 132,607 scaffolds with an N50 value of 10.5 kb contains a total of 21,771 predicted protein-coding genes. We identified 6.6 – 14.5 million heterozygous SNPs in the assembled genome of the three natural color variants (green, red, and black), resulting in an estimated nucleotide diversity of 0.00146.

**Conclusions:** We report the first draft genome of *A. japonicus* and provide a general overview of the genetic variation in the three major color variants of *A. japonicus*. These data will help provide a comprehensive view of the genetic, physiological, and evolutionary relationships among color variants in *A. japonicus*, and will be invaluable resources for sea cucumber genomic research.

1  
2  
3  
4  
5  
6  
7  
8  
9  
10  
11  
12  
13  
14  
15  
16  
17  
18  
19  
20  
21  
22  
23  
24  
25  
26  
27  
28  
29  
30  
31  
32  
33  
34  
35  
36  
37  
38  
39  
40  
41  
42  
43  
44  
45  
46  
47  
48  
49  
50  
51  
52  
53  
54  
55  
56  
57  
58  
59  
60  
61  
62  
63  
64  
65

**Keywords:** Sea cucumber genome, *Apostichopus japonicus*, Color variants, Genetic variation, Population genomics

## Data description

### Background information on *A. japonicus*

The class Holothuroidea (also known as sea cucumbers) belongs to the phylum Echinodermata and comprises approximately 1,250 recorded species worldwide, including some species that are of commercial and medical value [1, 2]. *Apostichopus japonicus* Selenka 1867 is one of the well-known, commercially important sea cucumber species and occurs in the northwestern Pacific coast including China, Japan, Korea and the Far Eastern seas. This species exhibits a wide array of dorsal/ventral color variants (in particular green, red, and black; Fig 1), which differ in their biological and morphological attributes (e.g., shape of ossicle, habitat preference, spawning period, and polian vesicles) [1, 3]. Recently, overexploitation and the prevalence of biotic disease (viral infections) in sea cucumber aquaculture have generated increasing conservation concern [4, 5]. However, the genomic knowledge base and resources available to researchers for use in managing this natural resource or establishing genetically based breeding systems are still in a nascent stage [6].

### Sample collection and genomic DNA extraction

Specimens of the three color *A. japonicus* variants (green, red, and black) were collected from same geographical location (GPS data: 34.1 N, 127.18E, Geomun-do, Yeosu, Republic of Korea). Genomic DNA of each color variant was extracted manually from body wall tissues of single male specimens. Briefly, we ground the tissues to fine powder using mortar and pestle with liquid nitrogen freezing. Tissue powders were digested for 1 hour at 65 °C in CTAB (Cetyltrimethylammonium bromide) lysis buffer (2% CTAB, 1.4 M NaCl, 20 mM EDTA, 100 mM Tris-HCl, and pH 8.0), followed by

1  
2 Phenol/Chloroform extraction and ethanol precipitation.  
3  
4  
5  
6

## 7 **Sequencing and quality control**

8  
9 Using the standard protocol provided by Illumina (San Diego, USA), we  
10 constructed both short-insert (180 and 400 bp) and long-insert (2 kb) libraries for 2 x  
11  
12 101 bp paired-end reads, which were sequenced using a HiSeq 2000 instrument. For the  
13  
14 green color variant, a total of 225 Gb of raw data was generated from all three libraries.  
15  
16 In the case of the red and black color variants, 40 and 47 Gb of raw reads, respectively,  
17  
18 were produced by 400 bp short-insert library. The raw reads were preprocessed using  
19  
20 Trimmomatic v0.33 [7] and Trim Galore [8], in which reads containing adapter  
21  
22 sequences, poly-N sequences, or low quality bases (below a mean Phred score of 20)  
23  
24 were removed. To correct for errors in the raw sequences, we used ALLPATHS-LG  
25  
26 v52488 [9]. Approximately 208, 39, and 42 billion clean reads were obtained for green,  
27  
28 red, and black color variant samples, respectively (Table 1). The *A. japonicus* genome  
29  
30 size was estimated to be approximately 0.9 Gb based on k-mer measurement (Fig 2),  
31  
32 which is fully consistent with genome size measured by flow cytometry (~ 0.82 Gb)  
33  
34 [10]. Based on this estimation, the clean sequence reads correspond to about 356-fold  
35  
36 coverage of the *A. japonicus* genome.  
37  
38  
39  
40  
41  
42  
43  
44  
45  
46  
47

## 48 **Assembly**

49 For whole-genome assembly, we used reads only from green color variant  
50  
51 libraries and employed Platanus v1.2.4 [11], which is well suited for high-throughput  
52  
53 short reads and heterozygous diploid genomes. Briefly, error corrected paired-end  
54  
55 (insert size: 180 bp and 400 bp) reads were input for contig assembly. Next, all cleaned  
56  
57  
58  
59  
60  
61  
62  
63  
64  
65

1  
2 paired-end (insert size: 180 bp and 400 bp) and mate-paired (insert size: two 2 kb  
3  
4 samples) reads were mapped onto the contigs for scaffold building and were utilized for  
5  
6 gap filling (any nucleotide represented by “N” in scaffolds). After gap filling by  
7  
8 Platanus, the gaps that still remained in the resulting scaffolds were closed using  
9  
10 GapCloser (a module of SOAPdenovo2 [12]). The final genome assembly was 0.67 Gb  
11  
12 in total length, which is about 81.7 % of the estimated genome size by flow cytometry  
13  
14 (0.82 Gb) [10], and is composed of 132,607 scaffolds (> 1 kb) with an N50 value of  
15  
16 10.5 kb (Table 2). We assessed the completeness of the assembly using CEGMA  
17  
18 v2.4.010312 [13] and BUSCO v1.22 [14]. 73.4% of the core eukaryotic genes (based on  
19  
20 the 248 core essential genes) and 60.7% of the metazoan single-copy orthologs (based  
21  
22 on the 843 genes), respectively were identifiable in the genome. Because assembling  
23  
24 highly heterozygous genomes is a major challenge in *de novo* genome sequencing, we  
25  
26 further sought to explore whether there are other assemblers that could produce better  
27  
28 genome assembly statistics. We applied two popular genome assemblers,  
29  
30 SOAPdenovo2 2.04-r240 [12] and ALLPATHS-LG v52488 [9], and as expected [11],  
31  
32 the Platanus assembler was superior to the others (Table S1).  
33  
34  
35  
36  
37  
38  
39  
40  
41  
42

### 43 **Annotation**

44  
45  
46 To identify genomic repeat elements in the *A. japonicus* genome assembly, we  
47  
48 ran RepeatMasker (version 4.0.6) [15] using the Repbase TE library (release 20150807)  
49  
50 [16] and the *de novo* repeat library constructed by RepeatModeler (version 1.0.8) [17].  
51  
52 Approximately 27.2% of the *A. japonicus* genome was identified as interspersed repeats.  
53  
54

55  
56 Protein-coding genes were predicted using four steps. First, *ab initio* gene  
57  
58 prediction was performed with trained AUGUSTUS v3.2.1 [18] using hints from  
59  
60  
61  
62  
63  
64  
65

1  
2 splicing alignment of transcripts to the repeat-masked assembled genome with BLAT  
3  
4 [19] and PASA v2.0.2 [20]. To obtain high quality spliced alignments of expressed  
5  
6 transcript sequences for the AUGUSTUS training set, we collected RNA-seq data from  
7  
8 our previous [21] and other transcriptome [22] studies, and assembled reads from the  
9  
10 RNA-seq dataset using Trinity v2.1.1 [23]. Second, for homology-based gene prediction,  
11  
12 homologous proteins in other species (from UniProt [24]) were mapped to the repeat-  
13  
14 masked assembled genome using tBLASTn [25] with an  $E$ -value  $\leq 1 \times 10^{-5}$ . The aligned  
15  
16 sequences were predicted using GeneWise v2.4.0 [26] to search for precise spliced  
17  
18 alignment and gene structures. Third, for homology-based gene prediction with  
19  
20 transcriptome evidence, existing RNA-seq reads [19, 21] were mapped to the repeat-  
21  
22 masked assembled genome using TopHat v2.1.0 [27], and gene models were built using  
23  
24 Cufflinks v2.2.1 [28]. Finally, the resulting gene sets from each approach were  
25  
26 integrated into a comprehensive and non-redundant consensus gene set. We predicted a  
27  
28 total of 21,771 ( $\geq 50$  amino acids) genes in the assembled *A. japonicus* genome  
29  
30 including 101,776 exons (average 4.67 exons per gene), and an average gene size of  
31  
32 5,402 nucleotides (average transcript size of 982 nucleotides) (Table. 2).  
33  
34  
35  
36  
37  
38  
39  
40  
41  
42  
43

#### 44 **Genetic polymorphism among natural color variants**

45  
46 To provide a general overview of the total genetic variation in the species, we  
47  
48 realigned reads from the green color variant to the assembled genome using BWA  
49  
50 v0.7.13 [29]. Picard v1.141 (<http://picard.sourceforge.net/>) was used to mark and  
51  
52 remove duplicates. Before SNP and small indel calling, we realigned reads with indels  
53  
54 using GATK RealignerTargetCreator and IndelRealigner v3.5 [30] to avoid  
55  
56 misalignment around indels. Next, GATK Haplotypecaller was used to call SNPs and  
57  
58  
59  
60  
61  
62  
63  
64  
65

1  
2 indels from the resulting sequences. In this study, we observed nucleotide-level  
3  
4 heterozygosity within the assembled genome to be 0.986 %; namely, we identified a  
5  
6 total of 6,550,122 SNPs at the assembled genome, for a heterozygous SNP rate of  
7  
8 0.00986 per site. This high rate of nucleotide polymorphism is not uncommon in marine  
9  
10 invertebrates and also have found in the sea urchin genome (~1%; at least one SNP per  
11  
12 100 bases) [31], which belongs to the same phylum.  
13  
14  
15

16  
17 To measure nucleotide diversity in *A. japonicus*, the aforementioned analyses  
18  
19 were repeated for red and black color variants separately, and VCFtools v0.1.14 [32]  
20  
21 with sliding window analysis (bin 10 kb, step 1 kb) was used to calculate nucleotide  
22  
23 diversity. We identified 6.6 – 14.5 million heterozygous SNPs (1.7 – 3.7 million small  
24  
25 indels) in the assembled genome from the three natural color variants (Table 3),  
26  
27 resulting in an estimated nucleotide diversity of 0.00146.  
28  
29  
30

31  
32 In summary, we report the first draft genome of *A. japonicus* and provide a  
33  
34 general overview of the genetic variation in its three color variants (green, red, and  
35  
36 black). These data will help elucidate the genetic, physiological, and evolutionary  
37  
38 relationships among different color variants in *A. japonicus* and will be invaluable  
39  
40 resources for sea cucumber genomic research.  
41  
42  
43  
44  
45

#### 46 **Availability of supporting data**

47

48  
49 The raw dataset of all *Apostichopus japonicus* genome libraries was deposited  
50  
51 in the NCBI database with BioProject accession number PRJNA335936 and SRA  
52  
53 accession number SRP082485. The additional dataset associated with genome  
54  
55 annotation was deposited in GigaDB. The RNA-seq datasets used in this study were  
56  
57 downloaded from the ENA database with accession number PRJEB12167 and the NCBI  
58  
59  
60  
61  
62  
63  
64  
65



1  
2 database with SRA accession number SRA046386.  
3  
4  
5

## 6 7 **Abbreviations**

8  
9 bp: base pairs; kb: kilobases; Gb: Gigabases; TE: Transposable element; RNA-seq:

10  
11 High-throughput messenger RNA sequencing; SNP: Single nucleotide polymorphism;

12  
13 Indel: Insertion and deletion.  
14  
15  
16

## 17 18 19 **Competing interests**

20  
21 The authors declare that they have no competing interests.  
22  
23  
24  
25

## 26 27 **Authors' contributions**

28  
29 CP designed the study; CP, JKP, SJC contributed to the project coordination; JJ, HGL,

30  
31 HHH, and SJ collected the samples and extracted the genomic DNA; CP, JO, SGL, and

32  
33 SC conducted the genome analyses; CP, JKP, JJ and EK wrote the paper; All authors

34  
35 read and approved the final manuscript.  
36  
37  
38  
39  
40

## 41 42 **Acknowledgements**

43  
44 This work was supported by research grants from the Marine Biotechnology Program

45  
46 (PJT200620, Genome Analysis of Marine Organisms and Development of Functional

47  
48 Applications) funded by the Ministry of Oceans and Fisheries of the Republic of Korea

49  
50 to CP, JKP, SJC and from the Basic Science Research Program through the National

51  
52 Research Foundation of Korea (NRF) funded by the Ministry of Science, ICT & Future

53  
54 Planning (NRF-2015R1C1A1A02036896) to CP.  
55  
56  
57  
58  
59  
60  
61  
62  
63  
64  
65

1  
2 **Author details**  
3

4  
5 <sup>a</sup> School of Biological Sciences and Technology, Chonnam National University,  
6 Gwangju 61186, Republic of Korea. <sup>b</sup> Marine Ecological Disturbing and Harmful  
7 Organisms Research Center, Department of Oceanography, Chonnam National  
8 University, Gwangju 61186, Republic of Korea. <sup>c</sup> Division of EcoScience, Ewha  
9 Womans University, Seoul 03760, Republic of Korea. <sup>d</sup> Department of Biology, College  
10 of Natural Sciences, Chungbuk National University, Cheongju, Chungbuk 28644,  
11 Republic of Korea.  
12  
13  
14  
15  
16  
17  
18  
19  
20  
21  
22  
23  
24  
25  
26  
27  
28  
29  
30  
31  
32  
33  
34  
35  
36  
37  
38  
39  
40  
41  
42  
43  
44  
45  
46  
47  
48  
49  
50  
51  
52  
53  
54  
55  
56  
57  
58  
59  
60  
61  
62  
63  
64  
65

## References

1. Choe S, Oshima, Y. On the morphological and ecological differences between two commercial forms, "Green" and "Red", of the Japanese common sea cucumber, *Stichopus japonicus* Selenka. *Nippon Suisan Gakkaishi*. 1961;27:97–105.
2. Kanno M, Kijima, A. Quantitative and qualitative evaluation on the color variation of the Japanese sea cucumber *Stichopus japonicus*. *Suisanzoshoku*. 2002;50:63–9.
3. Hongsheng Yang J-FH, Annie Mercier. *The Sea Cucumber *Apostichopus japonicus*: History, Biology and Aquaculture*. Academic Press; 2015.
4. Bordbar S, Anwar F, Saari N. High-value components and bioactives from sea cucumbers for functional foods--a review. *Mar Drugs*. 2011;9(10):1761-805. doi:10.3390/md9101761.
5. Purcell SW. Value, market preferences and trade of Beche-de-mer from Pacific Island sea cucumbers. *PloS one*. 2014;9(4):e95075. doi:10.1371/journal.pone.0095075.
6. Long KA, Nossa CW, Sewell MA, Putnam NH, Ryan JF. Low coverage sequencing of three echinoderm genomes: the brittle star *Ophionereis fasciata*, the sea star *Patiriella regularis*, and the sea cucumber *Australostichopus mollis*. *Gigascience*. 2016;5:20. doi:10.1186/s13742-016-0125-6.
7. Bolger AM, Lohse M, Usadel B. Trimmomatic: a flexible trimmer for Illumina sequence data. *Bioinformatics*. 2014;30(15):2114-20. doi:10.1093/bioinformatics/btu170.
8. Krueger F. Trim Galore!: A wrapper tool around Cutadapt and FastQC to consistently apply quality and adapter trimming to FastQ files. 2015. [http://www.bioinformatics.babraham.ac.uk/projects/trim\\_galore/](http://www.bioinformatics.babraham.ac.uk/projects/trim_galore/).
9. Gnerre S, Maccallum I, Przybylski D, Ribeiro FJ, Burton JN, Walker BJ et al. High-quality draft assemblies of mammalian genomes from massively parallel sequence data. *Proceedings of the National Academy of Sciences of the United States of America*. 2011;108(4):1513-8. doi:10.1073/pnas.1017351108.
10. LIU Jin ZX-j, SU Lin, LIU Shi-lin, RU Shao-guo, YANG Hong-sheng. Genome size determination of sea cucumber (*Apostichopus japonicus*). *JOURNAL OF FISHERIES OF CHINA*. 2012;Vol.36, No.5. doi:10.3724/SPJ.1231.2012.27753.
11. Kajitani R, Toshimoto K, Noguchi H, Toyoda A, Ogura Y, Okuno M et al. Efficient de novo assembly of highly heterozygous genomes from whole-genome shotgun short reads. *Genome research*. 2014;24(8):1384-95. doi:10.1101/gr.170720.113.
12. Luo R, Liu B, Xie Y, Li Z, Huang W, Yuan J et al. SOAPdenovo2: an empirically improved memory-efficient short-read de novo assembler. *Gigascience*. 2012;1(1):18. doi:10.1186/2047-217X-1-18.
13. Parra G, Bradnam K, Korf I. CEGMA: a pipeline to accurately annotate core genes in eukaryotic genomes. *Bioinformatics*. 2007;23(9):1061-7. doi:10.1093/bioinformatics/btm071.
14. Simao FA, Waterhouse RM, Ioannidis P, Kriventseva EV, Zdobnov EM. BUSCO: assessing

1  
2 genome assembly and annotation completeness with single-copy orthologs. *Bioinformatics*.  
3 2015;31(19):3210-2. doi:10.1093/bioinformatics/btv351.

4  
5 15. Smit AFA, Hubley R, Green P. RepeatMasker 4.0.6. 2015.  
6 <http://www.repeatmasker.org/>.

7  
8  
9 16. Bao W, Kojima KK, Kohany O. Repbase Update, a database of repetitive elements in  
10 eukaryotic genomes. *Mob DNA*. 2015;6:11. doi:10.1186/s13100-015-0041-9.

11  
12 17. Smit A, Hubley R. RepeatModeler Open-1.0. 2015. <http://www.repeatmasker.org/>.

13  
14 18. Stanke M, Diekhans M, Baertsch R, Haussler D. Using native and syntenically mapped  
15 cDNA alignments to improve de novo gene finding. *Bioinformatics*. 2008;24(5):637-44.  
16 doi:10.1093/bioinformatics/btn013.

17  
18 19. Kent WJ. BLAT--the BLAST-like alignment tool. *Genome research*. 2002;12(4):656-64.  
19 doi:10.1101/gr.229202. Article published online before March 2002.

20  
21 20. Haas BJ, Delcher AL, Mount SM, Wortman JR, Smith RK, Jr., Hannick LI et al. Improving  
22 the Arabidopsis genome annotation using maximal transcript alignment assemblies. *Nucleic  
23 acids research*. 2003;31(19):5654-66.

24  
25 21. Jo J, Park J, Lee HG, Kern EM, Cheon S, Jin S et al. Comparative transcriptome analysis of  
26 three color variants of the sea cucumber *Apostichopus japonicus*. *Marine genomics*. 2016.  
27 doi:10.1016/j.margen.2016.03.009.

28  
29 22. Du H, Bao Z, Hou R, Wang S, Su H, Yan J et al. Transcriptome sequencing and  
30 characterization for the sea cucumber *Apostichopus japonicus* (Selenka, 1867). *PloS one*.  
31 2012;7(3):e33311. doi:10.1371/journal.pone.0033311.

32  
33 23. Grabherr MG, Haas BJ, Yassour M, Levin JZ, Thompson DA, Amit I et al. Full-length  
34 transcriptome assembly from RNA-Seq data without a reference genome. *Nat Biotechnol*.  
35 2011;29(7):644-52. doi:10.1038/nbt.1883.

36  
37 24. UniProt C. UniProt: a hub for protein information. *Nucleic acids research*.  
38 2015;43(Database issue):D204-12. doi:10.1093/nar/gku989.

39  
40 25. Camacho C, Coulouris G, Avagyan V, Ma N, Papadopoulos J, Bealer K et al. BLAST+:  
41 architecture and applications. *BMC Bioinformatics*. 2009;10:421. doi:10.1186/1471-2105-10-  
42 421.

43  
44 26. Li W, Cowley A, Uludag M, Gur T, McWilliam H, Squizzato S et al. The EMBL-EBI  
45 bioinformatics web and programmatic tools framework. *Nucleic acids research*.  
46 2015;43(W1):W580-4. doi:10.1093/nar/gkv279.

47  
48 27. Kim D, Pertea G, Trapnell C, Pimentel H, Kelley R, Salzberg SL. TopHat2: accurate  
49 alignment of transcriptomes in the presence of insertions, deletions and gene fusions.  
50 *Genome Biol*. 2013;14(4):R36. doi:10.1186/gb-2013-14-4-r36.

51  
52 28. Trapnell C, Roberts A, Goff L, Pertea G, Kim D, Kelley DR et al. Differential gene and  
53 transcript expression analysis of RNA-seq experiments with TopHat and Cufflinks. *Nature*  
54  
55  
56  
57  
58  
59  
60  
61  
62  
63  
64  
65

1  
2 protocols. 2012;7(3):562-78. doi:10.1038/nprot.2012.016.

3  
4 29. Li H, Durbin R. Fast and accurate short read alignment with Burrows-Wheeler transform.  
5 Bioinformatics. 2009;25(14):1754-60. doi:10.1093/bioinformatics/btp324.  
6

7 30. McKenna A, Hanna M, Banks E, Sivachenko A, Cibulskis K, Kernytsky A et al. The Genome  
8 Analysis Toolkit: a MapReduce framework for analyzing next-generation DNA sequencing  
9 data. Genome research. 2010;20(9):1297-303. doi:10.1101/gr.107524.110.  
10

11 31. Sea Urchin Genome Sequencing C, Sodergren E, Weinstock GM, Davidson EH, Cameron  
12 RA, Gibbs RA et al. The genome of the sea urchin *Strongylocentrotus purpuratus*. Science.  
13 2006;314(5801):941-52. doi:10.1126/science.1133609.  
14

15 32. Danecek P, Auton A, Abecasis G, Albers CA, Banks E, DePristo MA et al. The variant call  
16 format and VCFtools. Bioinformatics. 2011;27(15):2156-8. doi:10.1093/bioinformatics/btr330.  
17  
18  
19  
20  
21  
22  
23  
24  
25  
26  
27  
28  
29  
30  
31  
32  
33  
34  
35  
36  
37  
38  
39  
40  
41  
42  
43  
44  
45  
46  
47  
48  
49  
50  
51  
52  
53  
54  
55  
56  
57  
58  
59  
60  
61  
62  
63  
64  
65

**Table 1. Statistics on total reads of the *Apostichopus japonicus* genome.**

| Variants | Insertion size (bp) | Total reads*<br>(Raw data) | Total reads*<br>(w/o adaptor) | Total reads*<br>(error corrected) | % error corrected |
|----------|---------------------|----------------------------|-------------------------------|-----------------------------------|-------------------|
| Green    | 180                 | 498,608,646                | 474,117,288                   | 466,062,920                       | 1.70              |
|          | 400                 | 897,432,174                | 842,766,704                   | 831,964,242                       | 1.28              |
|          | 2000 (v1)           | 293,701,464                | 270,513,434                   | 268,573,812                       | 0.72              |
|          | 2000 (v2)           | 538,359,438                | 496,446,984                   | 493,387,418                       | 0.62              |
|          | Total               | 2,228,101,722              | 2,083,844,410                 | 2,059,988,392                     | 1.14              |
| Red      | 400                 | 397,799,042                | 394,984,810                   | 383,734,440                       | 2.85              |
| Black    | 400                 | 460,597,940                | 423,543,558                   | 416,007,614                       | 1.78              |

Note: \*The length of each read is 101 bp.

1  
2  
3  
4  
5  
6  
7  
8  
9  
10  
11  
12  
13  
14  
15  
16  
17  
18  
19  
20  
21  
22  
23  
24  
25  
26  
27  
28  
29  
30  
31  
32  
33  
34  
35  
36  
37  
38  
39  
40  
41  
42  
43  
44  
45  
46  
47  
48  
49  
50  
51  
52  
53  
54  
55  
56  
57  
58  
59  
60  
61  
62  
63  
64  
65

**Table 2. Statistics on *Apostichopus japonicus* genome assembly**

| Statistic                        | Value       |
|----------------------------------|-------------|
| Total assembled bases (bp)       | 664,375,288 |
| Average length of scaffolds (bp) | 5,010       |
| Number of scaffolds              | 132,607     |
| Length of longest scaffold (bp)  | 131,537     |
| GC content (%)                   | 35.92       |
| N50 (bp)                         | 10,488      |
| Number of genes                  | 21,771      |
| Number of exons per gene         | 4.67        |
| Average exon length (bp)         | 209         |
| Number of introns per gene       | 4.21        |
| Average intron length (bp)       | 1,048       |

1  
2  
3  
4  
5  
6  
7  
8  
9  
10  
11  
12  
13  
14  
15  
16  
17  
18  
19  
20  
21  
22  
23  
24  
25  
26  
27  
28  
29  
30  
31  
32  
33  
34  
35  
36  
37  
38  
39  
40  
41  
42  
43  
44  
45  
46  
47  
48  
49  
50  
51  
52  
53  
54  
55  
56  
57  
58  
59  
60  
61  
62  
63  
64  
65

**Table 3. SNP and small indel statistics among three color variants.**

| Variants | # of heterozygous SNP loci | # of small indel loci |
|----------|----------------------------|-----------------------|
| Green    | 6,550,122                  | 1,662,708             |
| Red      | 14,509,713                 | 3,681,007             |
| Black    | 12,627,560                 | 3,198,584             |



1  
2 **Figure legends**  
3  
4  
5

6 **Figure 1. Three color-variants of *Apostichopus japonicus*.** (A) Dorsal view of the  
7 three color variants. Left to right: red, green, and black. (B) Ventral view of the three  
8 color variants. Left to right: red, green, and black.  
9  
10

11  
12  
13 **Figure 2. K-mer distribution of the *Apostichopus japonicus* genome.**  
14  
15

16  
17 **Figure 3. Schematic workflow of *Apostichopus japonicus* genome assembly and**  
18 **annotation.** The left side represents the genome assembly and the right side represents  
19 the transcriptome assembly that was performed in previous publications. To achieve  
20 suitable gene prediction, we integrated these two assembly results.  
21  
22  
23  
24  
25  
26  
27  
28  
29  
30  
31  
32  
33  
34  
35  
36  
37  
38  
39  
40  
41  
42  
43  
44  
45  
46  
47  
48  
49  
50  
51  
52  
53  
54  
55  
56  
57  
58  
59  
60  
61  
62  
63  
64  
65

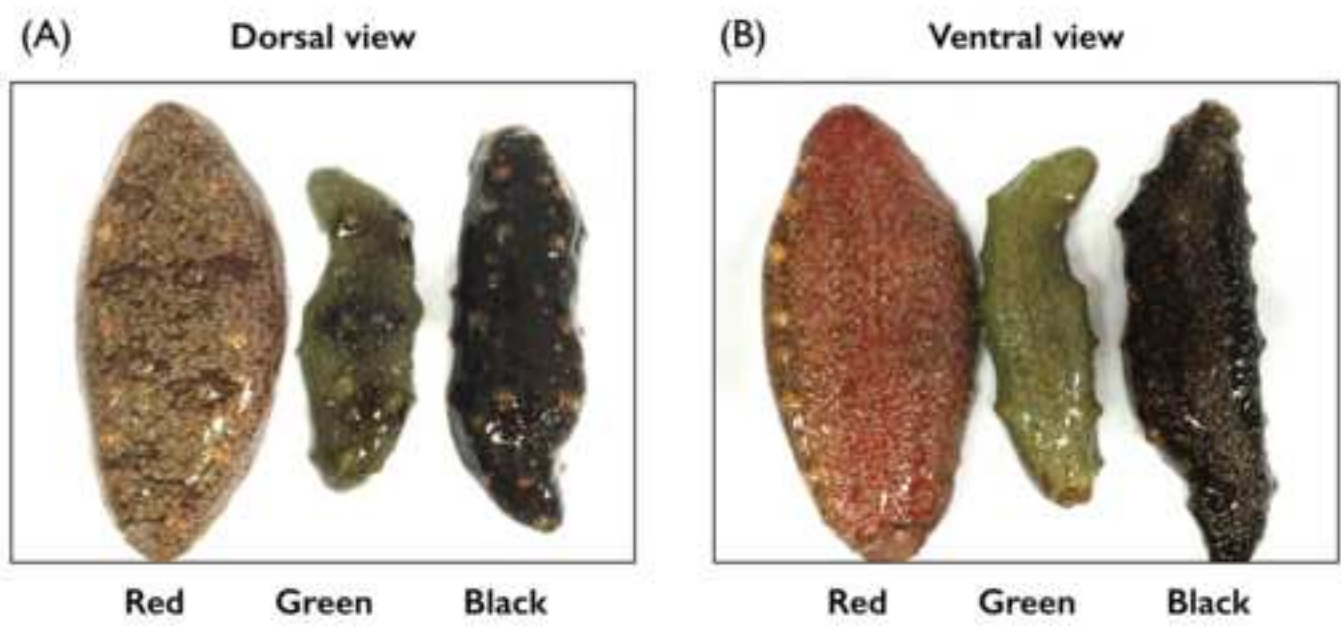

Figure 1

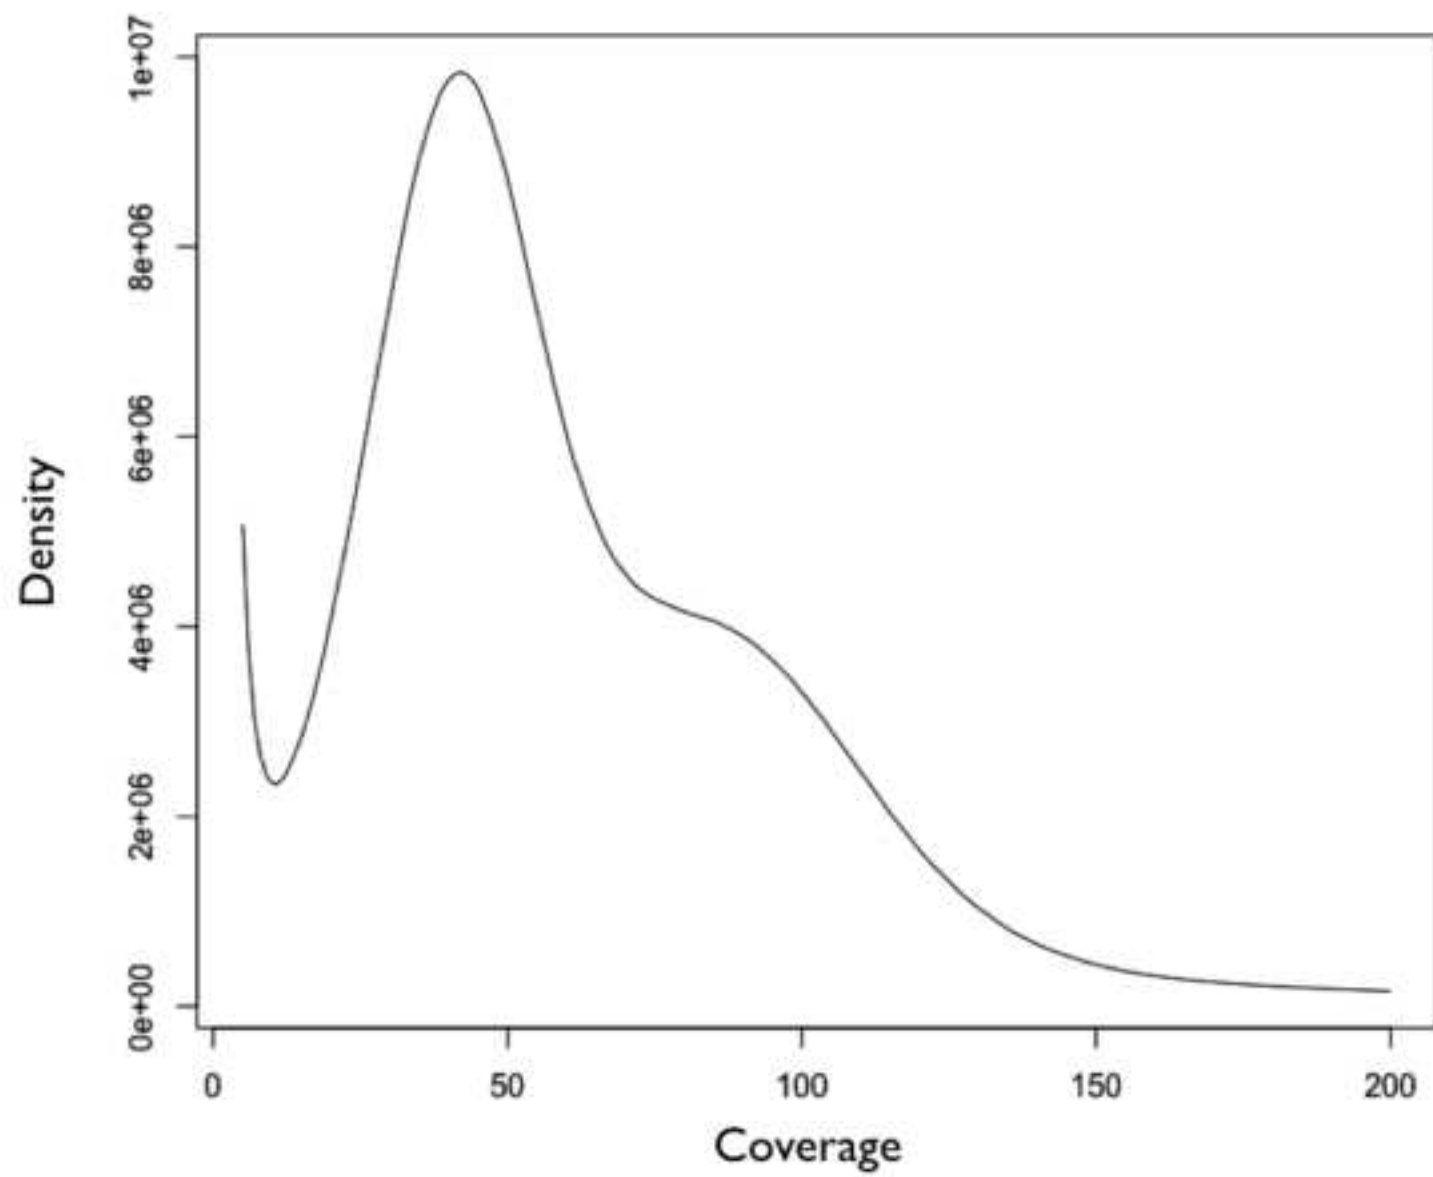

Figure 2

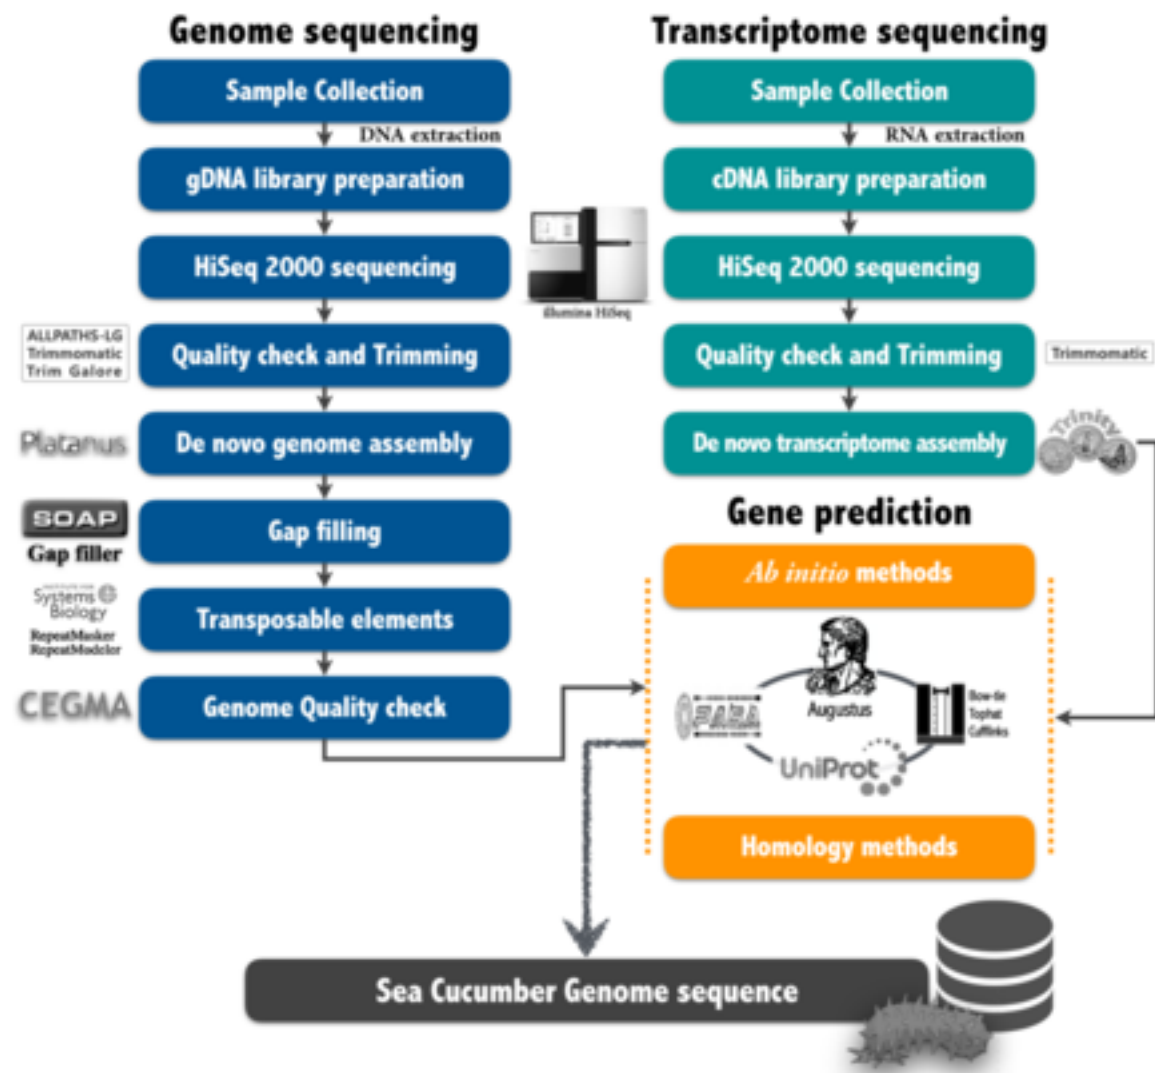

Figure 3



Click here to access/download  
**Supplementary Material**  
Table S1.docx



Sep. 1, 2016.

Dear Editor:

Please consider our manuscript entitled “**Draft genome of the sea cucumber *Apostichopus japonicus* and genetic polymorphism among color variants**” for consideration of publication as a Data note in *Gigascience*. *Apostichopus japonicus* is one of the well-known, commercially important sea cucumber species and occurs in the northwestern Pacific coast including China, Japan, Korea and the Far Eastern seas. This species exhibits a wide array of dorsal/ventral color variants (in particular green, red, and black), which differ in their biological and morphological attributes. Recently, overexploitation and the prevalence of biotic disease in sea cucumber aquaculture have generated increasing conservation concern. However, the genomic knowledge base and resources available to researchers for use in managing this natural resource or establishing genetically based breeding systems are still in a nascent stage.

We believe that our work is suitable for *Gigascience* for the following two reasons. **First**, We report the first draft genome of *A. japonicus*. A total of 312 gigabases (Gb) of raw sequences were generated using the Illumina HiSeq 2000 platform and assembled to a final size of 0.67 Gb which is about 81.7 % of the estimated genome size (0.82 Gb). We observed nucleotide-level heterozygosity within the assembled genome to be 0.986 %. The resulting draft genome assembly comprising 132,607 scaffolds with an N50 value of 10.5 kb contains a total of 21,771 predicted protein-coding genes. **Second**, we provide a general overview of the genetic variation in the three major color variants of *A. japonicus*. We identified 6.6 – 14.5 million heterozygous SNPs in the assembled genome of the three natural color variants (green, red, and black), resulting in an estimated nucleotide diversity of 0.00146. For the above reasons, we expect that our paper will help provide a comprehensive view of the genetic, physiological, and evolutionary relationships among color variants in *A. japonicus*, and will be invaluable resources for sea cucumber genomic research.

Thank you very much for considering our manuscript.

Sincerely,

Chungoo Park  
Assistant Professor of School of Biological Sciences and Technology  
Chonnam National University  
Gwangju, Republic of Korea, 500-757  
Phone: +82-62-530-1913  
Email: chungoo@jnu.ac.kr
