# Supplementary material for: Draft genome of the sea cucumber Apostichopus japonicus and genetic polymorphism among color variants
Source: PubMed Central journal article supplement (PMC5437941; doi:10.1093/gigascience/giw006), 2017-01-07
Supplement: giw006_giga-d-16-00085_revision_2.pdf [file giw006_giga-d-16-00085_revision_2.pdf]

1  
2 **Data note**  
3  
4  
5

6 **Draft genome of the sea cucumber *Apostichopus japonicus* and genetic**  
7 **polymorphism among color variants**  
8  
9

10  
11  
12  
13  
14  
15  
16  
17 Jihoon Jo<sup>a#</sup>, Jooseong Oh<sup>a#</sup>, Hyun-Gwan Lee<sup>b</sup>, Hyun-Hee Hong<sup>a</sup>, Sung-Gwon Lee<sup>a</sup>,  
18 Seongmin Cheon<sup>a</sup>, Elizabeth M. A. Kern<sup>c</sup>, Soyeong Jin<sup>c</sup>, Sung-Jin Cho<sup>d\*</sup>, Joong-Ki Park<sup>c\*</sup>,  
19 and Chungoo Park<sup>a\*</sup>  
20  
21  
22  
23

24 <sup>a</sup> School of Biological Sciences and Technology, Chonnam National University,  
25 Gwangju 61186, Republic of Korea  
26

27 <sup>b</sup> Marine Ecological Disturbing and Harmful Organisms Research Center, Department  
28 of Oceanography, Chonnam National University, Gwangju 61186, Republic of Korea  
29

30 <sup>c</sup> Division of EcoScience, Ewha Womans University, Seoul 03760, Republic of Korea.  
31

32 <sup>d</sup> Department of Biology, College of Natural Sciences, Chungbuk National University,  
33 Cheongju, Chungbuk 28644, Republic of Korea  
34  
35

36 <sup>#</sup> These authors equally contributed this work.  
37  
38  
39  
40  
41  
42  
43  
44  
45  
46  
47

48 \*Corresponding Authors.  
49

50 E-mail addresses:

51 Chungoo Park, [chungoo@jnu.ac.kr](mailto:chungoo@jnu.ac.kr). Tel: +82-62-530-1913. Fax: +82-62-530-2199  
52

53 Joong-Ki Park, [jpark@ewha.ac.kr](mailto:jpark@ewha.ac.kr). Tel: +82-2-3277-5948. Fax: +82-2-3277-2385.  
54

55 Sung-Jin Cho, [sjchobio@chungbuk.ac.kr](mailto:sjchobio@chungbuk.ac.kr). Tel: +82-43-261-2294. Fax: +82-43-260-2298.  
56  
57  
58  
59  
60  
61  
62  
63  
64  
65

1  
2  
3  
4  
5  
6  
7  
8  
9  
10  
11  
12  
13  
14  
15  
16  
17  
18  
19  
20  
21  
22  
23  
24  
25  
26  
27  
28  
29  
30  
31  
32  
33  
34  
35  
36  
37  
38  
39  
40  
41  
42  
43  
44  
45  
46  
47  
48  
49  
50  
51  
52  
53  
54  
55  
56  
57  
58  
59  
60  
61  
62  
63  
64  
65

## Abstract

**Background:** The Japanese sea cucumber (*Apostichopus japonicus* Selenka 1867) is an economically important species as a source of seafood and ingredient in traditional medicine. It is mainly found off the coasts of northeast Asia. Recently, substantial exploitation and widespread biotic disease in *A. japonicus* have generated increasing conservation concern. However, the genomic knowledge base and resources available for researchers to use in managing this natural resource and to establish genetically based breeding systems for sea cucumber aquaculture are still in a nascent stage.

**Findings:** A total of 312 gigabases (Gb) of raw sequences were generated using the Illumina HiSeq 2000 platform and assembled to a final size of 0.66 Gb which is about 80.5 % of the estimated genome size (0.82 Gb). We observed nucleotide-level heterozygosity within the assembled genome to be 0.986 %. The resulting draft genome assembly comprising 132,607 scaffolds with an N50 value of 10.5 kb contains a total of 21,771 predicted protein-coding genes. We identified 6.6 – 14.5 million heterozygous SNPs in the assembled genome of the three natural color variants (green, red, and black), resulting in an estimated nucleotide diversity of 0.00146.

**Conclusions:** We report the first draft genome of *A. japonicus* and provide a general overview of the genetic variation in the three major color variants of *A. japonicus*. These data will help provide a comprehensive view of the genetic, physiological, and evolutionary relationships among color variants in *A. japonicus*, and will be invaluable resources for sea cucumber genomic research.

1  
2  
3  
4  
5  
6  
7  
8  
9  
10  
11  
12  
13  
14  
15  
16  
17  
18  
19  
20  
21  
22  
23  
24  
25  
26  
27  
28  
29  
30  
31  
32  
33  
34  
35  
36  
37  
38  
39  
40  
41  
42  
43  
44  
45  
46  
47  
48  
49  
50  
51  
52  
53  
54  
55  
56  
57  
58  
59  
60  
61  
62  
63  
64  
65

**Keywords:** Sea cucumber genome, *Apostichopus japonicus*, Color variants, Genetic variation, Population genomics

## Data description

### Background information on *A. japonicus*

The class Holothuroidea (also known as sea cucumbers) belongs to the phylum Echinodermata and comprises approximately 1,250 recorded species worldwide, including some species that are of commercial and medical value [1, 2]. *Apostichopus japonicus* Selenka 1867 is one of the well-known, commercially important sea cucumber species and occurs in the northwestern Pacific coast including China, Japan, Korea and the Far Eastern seas. This species exhibits a wide array of dorsal/ventral color variants (in particular green, red, and black; Fig 1), which differ in their biological and morphological attributes (e.g., shape of ossicle, habitat preference, spawning period, and polian vesicles) [1, 3]. The red variant is found on rock pebbles and gravel substrate and has higher salinity and temperature tolerance than the other color variants [4, 5]. Green and black variants are found on sandy and muddy bottoms at shallower depths, and the green variant has greater plasticity in thermotolerance than the red variant [6, 7].

Recently, overexploitation and the prevalence of biotic disease (viral infections) in sea cucumber aquaculture have generated increasing conservation concern [8, 9]. However, the genomic knowledge base and resources available to researchers for use in managing this natural resource or establishing genetically based breeding systems are still in a nascent stage [10].

### Sample collection and genomic DNA extraction

Specimens of the three color *A. japonicus* variants (green, red, and black) were collected from same geographical location (GPS data: 34.1 N, 127.18E, Geomun-do,

1  
2 Yeosu, Republic of Korea). Genomic DNA of each color variant was extracted manually  
3  
4 from body wall tissues of single male specimens. Briefly, we ground the tissues to fine  
5  
6 powder using mortar and pestle with liquid nitrogen freezing. Tissue powders were  
7  
8 digested for 1 hour at 65 °C in CTAB (Cetyltrimethylammonium bromide) lysis buffer  
9  
10 (2% CTAB, 1.4 M NaCl, 20 mM EDTA, 100 mM Tris-HCl, and pH 8.0), followed by  
11  
12 Phenol/Chloroform extraction and ethanol precipitation.  
13  
14  
15  
16  
17  
18

### 19 **Sequencing and quality control**

20  
21 Using the standard protocol provided by Illumina (San Diego, USA), we  
22  
23 constructed both short-insert (180 and 400 bp) and long-insert (2 kb) libraries for 2 x  
24  
25 101 bp paired-end reads, which were sequenced using a HiSeq 2000 instrument. For the  
26  
27 green color variant, a total of 225 Gb of raw data was generated from all three libraries.  
28  
29 In the case of the red and black color variants, 40 and 47 Gb of raw reads, respectively,  
30  
31 were produced by 400 bp short-insert library. The raw reads were preprocessed using  
32  
33 Trimmomatic v0.33 [11] and Trim Galore [12], in which reads containing adapter  
34  
35 sequences, poly-N sequences, or low quality bases (below a mean Phred score of 20)  
36  
37 were removed. To correct for errors in the raw sequences, we used ALLPATHS-LG  
38  
39 v52488 [13]. Approximately 208, 39, and 42 billion clean reads were obtained for  
40  
41 green, red, and black color variant samples, respectively (Table 1). The *A. japonicus*  
42  
43 genome size was estimated to be approximately 0.9 Gb based on k-mer measurement  
44  
45 (Fig 2), which is fully consistent with genome size measured by flow cytometry (~ 0.82  
46  
47 Gb) [14]. Based on this estimation, the clean sequence reads correspond to about 356-  
48  
49 fold coverage of the *A. japonicus* genome.  
50  
51  
52  
53  
54  
55  
56  
57  
58  
59  
60  
61  
62  
63  
64  
65

## Assembly

For whole-genome assembly, we used reads only from green color variant libraries and employed Platanus v1.2.4 [15], which is well suited for high-throughput short reads and heterozygous diploid genomes. Briefly, error corrected paired-end (insert size: 180 bp and 400 bp) reads were input for contig assembly. Next, all cleaned paired-end (insert size: 180 bp and 400 bp) and mate-paired (insert size: two 2 kb samples) reads were mapped onto the contigs for scaffold building and were utilized for gap filling (any nucleotide represented by “N” in scaffolds). After gap filling by Platanus, the gaps that still remained in the resulting scaffolds were closed using GapCloser (a module of SOAPdenovo2 [16]). The final genome assembly was 0.66 Gb in total length, which is about 80.5 % of the estimated genome size by flow cytometry (0.82 Gb) [14], and is composed of 132,607 scaffolds and unscaffolded contigs (**that are longer than or equal to 1 kb**) with an N50 value of 10.5 kb (Table 2). We assessed the completeness of the assembly using CEGMA v2.4.010312 [17] and BUSCO v1.22 [18]. 73.4% of the core eukaryotic genes (based on the 248 core essential genes) and 60.7% of the metazoan single-copy orthologs (based on the 843 genes), respectively were identifiable in the genome. Because assembling highly heterozygous genomes is a major challenge in *de novo* genome sequencing, we further sought to explore whether there are other assemblers that could produce better genome assembly statistics. We applied two popular genome assemblers, SOAPdenovo2 2.04-r240 [16] and ALLPATHS-LG v52488 [13], and as expected [15], the Platanus assembler was superior to the others (Table S1).

## Annotation

1  
2 To identify genomic repeat elements in the *A. japonicus* genome assembly, we  
3  
4 ran RepeatMasker (version 4.0.6) [19] using the Repbase TE library (release 20150807)  
5  
6 [20] and the *de novo* repeat library constructed by RepeatModeler (version 1.0.8) [21].  
7  
8 Approximately 27.2% of the *A. japonicus* genome was identified as interspersed  
9  
10 repeats.  
11  
12

13  
14 Protein-coding genes were predicted using four steps. First, *ab initio* gene  
15  
16 prediction was performed with trained AUGUSTUS v3.2.1 [22] using hints from  
17  
18 splicing alignment of transcripts to the repeat-masked assembled genome with BLAT  
19  
20 [23] and PASA v2.0.2 [24]. To obtain high quality spliced alignments of expressed  
21  
22 transcript sequences for the AUGUSTUS training set, we collected RNA-seq data from  
23  
24 our previous [25] (from body wall tissue of adult stage specimens) and other  
25  
26 transcriptome (from embryo, larva, and juvenile stages [developmental-stage specific];  
27  
28 from gonads, intestines, respiratory trees, and coelomic fluid of adults [tissue-specific])  
29  
30 [26] studies, and assembled reads from the RNA-seq dataset using Trinity v2.1.1 [27].  
31  
32 Second, for homology-based gene prediction, homologous proteins in other species  
33  
34 (from UniProt [28]) were mapped to the repeat-masked assembled genome using  
35  
36 tBLASTn [29] with an  $E$ -value  $\leq 1 \times 10^{-5}$ . The aligned sequences were predicted using  
37  
38 GeneWise v2.4.0 [30] to search for precise spliced alignment and gene structures. Third,  
39  
40 for homology-based gene prediction with transcriptome evidence, existing RNA-seq  
41  
42 reads [23, 25] were mapped to the repeat-masked assembled genome using TopHat  
43  
44 v2.1.0 [31], and gene models were built using Cufflinks v2.2.1 [32]. Finally, the  
45  
46 resulting gene sets from each approach were integrated into a comprehensive and non-  
47  
48 redundant consensus gene set. We predicted a total of 21,771 ( $\geq 50$  amino acids) genes  
49  
50 in the assembled *A. japonicus* genome including 101,776 exons (average 4.67 exons per  
51  
52  
53  
54  
55  
56  
57  
58  
59  
60  
61  
62  
63  
64  
65

1  
2 gene), and an average gene size of 5,402 nucleotides (average transcript size of 982  
3  
4 nucleotides) (Table. 2).  
5  
6  
7  
8

### 9 10 **Genetic polymorphism among natural color variants**

11  
12 To provide a general overview of the total genetic variation in the species, we  
13  
14 realigned reads from the green color variant to the assembled genome using BWA  
15  
16 v0.7.13 [33]. Picard v1.141 (<http://picard.sourceforge.net/>) was used to mark and  
17  
18 remove duplicates. Before SNP and small indel calling, we realigned reads with indels  
19  
20 using GATK RealignerTargetCreator and IndelRealigner v3.5 [34] to avoid  
21  
22 misalignment around indels. Next, GATK Haplotypecaller was used to call SNPs and  
23  
24 indels from the resulting sequences. In this study, we observed nucleotide-level  
25  
26 heterozygosity within the assembled genome to be 0.986 %; namely, we identified a  
27  
28 total of 6,550,122 SNPs at the assembled genome, for a heterozygous SNP rate of  
29  
30 0.00986 per site. This high rate of nucleotide polymorphism is not uncommon in marine  
31  
32 invertebrates and also has been found in the sea urchin genome (~1%; at least one SNP  
33  
34 per 100 bases) [35], which belongs to the same phylum.  
35  
36  
37  
38  
39  
40

41 To measure nucleotide diversity in *A. japonicus*, the aforementioned analyses  
42  
43 were repeated for red and black color variants separately, and VCFtools v0.1.14 [36]  
44  
45 with sliding window analysis (bin 10 kb, step 1 kb) was used to calculate nucleotide  
46  
47 diversity. We identified 6.6 – 14.5 million heterozygous SNPs (1.7 – 3.7 million small  
48  
49 indels) in the assembled genome from the three natural color variants (Table 3),  
50  
51 resulting in an estimated nucleotide diversity of 0.00146.  
52  
53  
54  
55

56 In summary, we report the first draft genome of *A. japonicus* and provide a  
57  
58 general overview of the genetic variation in its three color variants (green, red, and  
59  
60  
61  
62  
63  
64  
65



1  
2 black). These data will help elucidate the genetic, physiological, and evolutionary  
3  
4 relationships among different color variants in *A. japonicus* and will be invaluable  
5  
6 resources for sea cucumber genomic research.  
7  
8  
9

### 10 11 **Availability of supporting data**

12  
13  
14 The raw dataset of all *Apostichopus japonicus* genome libraries and the  
15  
16 assembly was deposited in the NCBI database with BioProject accession number  
17  
18 PRJNA335936, SRA accession number SRP082485, and GenBank accession number  
19  
20 MODV000000000. The additional dataset associated with genome annotation, along with  
21  
22 further supporting data are available in the GigaScience Database, GigaDB [37]. The  
23  
24 RNA-seq datasets used in this study were downloaded from the ENA database with  
25  
26 accession number PRJEB12167 and the NCBI database with SRA accession number  
27  
28 SRA046386.  
29  
30  
31  
32  
33  
34  
35

### 36 **Abbreviations**

37  
38 bp: base pairs; kb: kilobases; Gb: Gigabases; TE: Transposable element; RNA-seq:  
39  
40 High-throughput messenger RNA sequencing; SNP: Single nucleotide polymorphism;  
41  
42 Indel: Insertion and deletion.  
43  
44  
45  
46  
47

### 48 **Competing interests**

49  
50  
51 The authors declare that they have no competing interests.  
52  
53  
54  
55

### 56 **Authors' contributions**

57  
58 CP designed the study; CP, JKP, SJC contributed to the project coordination; JJ, HGL,  
59  
60  
61  
62  
63  
64  
65

1  
2 HHH, and SJ collected the samples and extracted the genomic DNA; CP, JO, SGL, and  
3  
4 SC conducted the genome analyses; CP, JKP, JJ and EK wrote the paper; All authors  
5  
6 read and approved the final manuscript.  
7  
8  
9

## 10 11 **Acknowledgements**

12  
13 This work was supported by research grants from the Marine Biotechnology Program  
14  
15 (PJT200620, Genome Analysis of Marine Organisms and Development of Functional  
16  
17 Applications) funded by the Ministry of Oceans and Fisheries of the Republic of Korea  
18  
19 to CP, JKP, SJC and from the Basic Science Research Program through the National  
20  
21 Research Foundation of Korea (NRF) funded by the Ministry of Science, ICT & Future  
22  
23 Planning (NRF-2015R1C1A1A02036896) to CP. This work was also supported by  
24  
25 National Research Foundation of Korea (NRF) grant funded by the Korean government  
26  
27 (MSIP) (NRF-2015R1A4A1041997) to JKP. This work was carried out with the  
28  
29 support of “Cooperative Research Program for Agriculture Science & Technology  
30  
31 Development (Signaling regulations and disease mechanisms research on exposure to  
32  
33 biological, chemical and environmental hazard substance, PJ01052301)” Rural  
34  
35 Development Administration, Republic of Korea to SJC.  
36  
37  
38  
39  
40  
41  
42  
43  
44  
45  
46  
47

## 48 **Author details**

49  
50  
51 <sup>a</sup> School of Biological Sciences and Technology, Chonnam National University, Gwangju  
52  
53 61186, Republic of Korea. <sup>b</sup> Marine Ecological Disturbing and Harmful Organisms  
54  
55 Research Center, Department of Oceanography, Chonnam National University, Gwangju  
56  
57 61186, Republic of Korea. <sup>c</sup> Division of EcoScience, Ewha Womans University, Seoul  
58  
59  
60  
61  
62  
63  
64  
65

1  
2  
3  
4  
5  
6  
7  
8  
9  
10  
11  
12  
13  
14  
15  
16  
17  
18  
19  
20  
21  
22  
23  
24  
25  
26  
27  
28  
29  
30  
31  
32  
33  
34  
35  
36  
37  
38  
39  
40  
41  
42  
43  
44  
45  
46  
47  
48  
49  
50  
51  
52  
53  
54  
55  
56  
57  
58  
59  
60  
61  
62  
63  
64  
65

03760, Republic of Korea. <sup>d</sup> Department of Biology, College of Natural Sciences,  
Chungbuk National University, Cheongju, Chungbuk 28644, Republic of Korea.

## References

1. Choe S, Oshima, Y. On the morphological and ecological differences between two commercial forms, "Green" and "Red", of the Japanese common sea cucumber, *Stichopus japonicus* Selenka. *Nippon Suisan Gakkaishi*. 1961;27:97–105.
2. Kanno M, Kijima, A. Quantitative and qualitative evaluation on the color variation of the Japanese sea cucumber *Stichopus japonicus*. *Suisanzoshoku*. 2002;50:63–9.
3. Hongsheng Yang J-FH, Annie Mercier. *The Sea Cucumber *Apostichopus japonicus*: History, Biology and Aquaculture*. Academic Press; 2015.
4. Yamamoto K, Handa T, Fujimoto K. Differences in tolerance to low-salinity among red, blue and black (color pattern) of the Japanese common sea cucumber, *Apostichopus japonicus* from ventilation in the respiratory tree. *Suisan Zoshoku*. 2003;v. 51:321-26.
5. Yamamoto K, Handa T, Fujimoto K. Effects of Water Temperature on Ventilation of the Japanese Common Sea Cucumber, *Apostichopus japonicus* of Different Color Pattern. *Aquaculture Science*. 2005;53(1):67-74. doi:10.11233/aquaculturesci1953.53.67.
6. Choe S. *Biology of the Japanese common sea cucumber *Stichopus japonicus* Selenka*. Pusan [sic]: Pusan National Univ.; 1963.
7. Dong Y-W, Ji T-T, Meng X-L, Dong S-L, Sun W-M. Difference in Thermotolerance Between Green and Red Color Variants of the Japanese Sea Cucumber, *Apostichopus japonicus* Selenka: Hsp70 and Heat-Hardening Effect. *The Biological Bulletin*. 2010;218(1):87-94. doi:10.1086/BBLv218n1p87.
8. Bordbar S, Anwar F, Saari N. High-value components and bioactives from sea cucumbers for functional foods--a review. *Mar Drugs*. 2011;9(10):1761-805. doi:10.3390/md9101761.
9. Purcell SW. Value, market preferences and trade of Beche-de-mer from Pacific Island sea cucumbers. *PloS one*. 2014;9(4):e95075. doi:10.1371/journal.pone.0095075.
10. Long KA, Nossa CW, Sewell MA, Putnam NH, Ryan JF. Low coverage sequencing of three echinoderm genomes: the brittle star *Ophionereis fasciata*, the sea star *Patiriella regularis*, and the sea cucumber *Australostichopus mollis*. *Gigascience*. 2016;5:20. doi:10.1186/s13742-016-0125-6.
11. Bolger AM, Lohse M, Usadel B. Trimmomatic: a flexible trimmer for Illumina sequence data. *Bioinformatics*. 2014;30(15):2114-20. doi:10.1093/bioinformatics/btu170.
12. Krueger F. Trim Galore!: A wrapper tool around Cutadapt and FastQC to consistently apply quality and adapter trimming to FastQ files. 2015. [http://www.bioinformatics.babraham.ac.uk/projects/trim\\_galore/](http://www.bioinformatics.babraham.ac.uk/projects/trim_galore/).
13. Gnerre S, Maccallum I, Przybylski D, Ribeiro FJ, Burton JN, Walker BJ et al. High-quality draft assemblies of mammalian genomes from massively parallel sequence data. *Proceedings of the National Academy of Sciences of the United States of America*. 2011;108(4):1513-8. doi:10.1073/pnas.1017351108.

- 1  
2  
3 14. LIU Jin ZX-j, SU Lin, LIU Shi-lin, RU Shao-guo, YANG Hong-sheng. Genome size  
4 determination of sea cucumber (*Apostichopus japonicus*). JOURNAL OF FISHERIES OF CHINA.  
5 2012;Vol.36, No.5. doi:10.3724/SP.J.1231.2012.27753.  
6  
7 15. Kajitani R, Toshimoto K, Noguchi H, Toyoda A, Ogura Y, Okuno M et al. Efficient de novo  
8 assembly of highly heterozygous genomes from whole-genome shotgun short reads. Genome  
9 research. 2014;24(8):1384-95. doi:10.1101/gr.170720.113.  
10  
11 16. Luo R, Liu B, Xie Y, Li Z, Huang W, Yuan J et al. SOAPdenovo2: an empirically improved  
12 memory-efficient short-read de novo assembler. Gigascience. 2012;1(1):18. doi:10.1186/2047-  
13 217X-1-18.  
14  
15 17. Parra G, Bradnam K, Korf I. CEGMA: a pipeline to accurately annotate core genes in  
16 eukaryotic genomes. Bioinformatics. 2007;23(9):1061-7. doi:10.1093/bioinformatics/btm071.  
17  
18 18. Simao FA, Waterhouse RM, Ioannidis P, Kriventseva EV, Zdobnov EM. BUSCO: assessing  
19 genome assembly and annotation completeness with single-copy orthologs. Bioinformatics.  
20 2015;31(19):3210-2. doi:10.1093/bioinformatics/btv351.  
21  
22 19. Smit AFA, Hubley R, Green P. RepeatMasker 4.0.6. 2015. <http://www.repeatmasker.org/>.  
23  
24 20. Bao W, Kojima KK, Kohany O. Repbase Update, a database of repetitive elements in  
25 eukaryotic genomes. Mob DNA. 2015;6:11. doi:10.1186/s13100-015-0041-9.  
26  
27 21. Smit A, Hubley R. RepeatModeler Open-1.0. 2015. <http://www.repeatmasker.org/>.  
28  
29 22. Stanke M, Diekhans M, Baertsch R, Haussler D. Using native and syntenically mapped cDNA  
30 alignments to improve de novo gene finding. Bioinformatics. 2008;24(5):637-44.  
31 doi:10.1093/bioinformatics/btn013.  
32  
33 23. Kent WJ. BLAT--the BLAST-like alignment tool. Genome research. 2002;12(4):656-64.  
34 doi:10.1101/gr.229202. Article published online before March 2002.  
35  
36 24. Haas BJ, Delcher AL, Mount SM, Wortman JR, Smith RK, Jr., Hannick LI et al. Improving the  
37 Arabidopsis genome annotation using maximal transcript alignment assemblies. Nucleic acids  
38 research. 2003;31(19):5654-66.  
39  
40 25. Jo J, Park J, Lee HG, Kern EM, Cheon S, Jin S et al. Comparative transcriptome analysis of  
41 three color variants of the sea cucumber *Apostichopus japonicus*. Marine genomics. 2016.  
42 doi:10.1016/j.margen.2016.03.009.  
43  
44 26. Du H, Bao Z, Hou R, Wang S, Su H, Yan J et al. Transcriptome sequencing and  
45 characterization for the sea cucumber *Apostichopus japonicus* (Selenka, 1867). PloS one.  
46 2012;7(3):e33311. doi:10.1371/journal.pone.0033311.  
47  
48 27. Grabherr MG, Haas BJ, Yassour M, Levin JZ, Thompson DA, Amit I et al. Full-length  
49 transcriptome assembly from RNA-Seq data without a reference genome. Nat Biotechnol.  
50 2011;29(7):644-52. doi:10.1038/nbt.1883.  
51  
52 28. UniProt C. UniProt: a hub for protein information. Nucleic acids research. 2015;43(Database  
53 issue):D204-12. doi:10.1093/nar/gku989.  
54  
55  
56  
57  
58  
59  
60  
61  
62  
63  
64  
65

- 1  
2  
3 29. Camacho C, Coulouris G, Avagyan V, Ma N, Papadopoulos J, Bealer K et al. BLAST+:  
4 architecture and applications. *BMC Bioinformatics*. 2009;10:421. doi:10.1186/1471-2105-10-  
5 421.  
6  
7 30. Li W, Cowley A, Uludag M, Gur T, McWilliam H, Squizzato S et al. The EMBL-EBI  
8 bioinformatics web and programmatic tools framework. *Nucleic acids research*.  
9 2015;43(W1):W580-4. doi:10.1093/nar/gkv279.  
10  
11 31. Kim D, Pertea G, Trapnell C, Pimentel H, Kelley R, Salzberg SL. TopHat2: accurate alignment  
12 of transcriptomes in the presence of insertions, deletions and gene fusions. *Genome Biol*.  
13 2013;14(4):R36. doi:10.1186/gb-2013-14-4-r36.  
14  
15 32. Trapnell C, Roberts A, Goff L, Pertea G, Kim D, Kelley DR et al. Differential gene and  
16 transcript expression analysis of RNA-seq experiments with TopHat and Cufflinks. *Nature*  
17 *protocols*. 2012;7(3):562-78. doi:10.1038/nprot.2012.016.  
18  
19 33. Li H, Durbin R. Fast and accurate short read alignment with Burrows-Wheeler transform.  
20 *Bioinformatics*. 2009;25(14):1754-60. doi:10.1093/bioinformatics/btp324.  
21  
22 34. McKenna A, Hanna M, Banks E, Sivachenko A, Cibulskis K, Kernytsky A et al. The Genome  
23 Analysis Toolkit: a MapReduce framework for analyzing next-generation DNA sequencing data.  
24 *Genome research*. 2010;20(9):1297-303. doi:10.1101/gr.107524.110.  
25  
26 35. Sea Urchin Genome Sequencing C, Sodergren E, Weinstock GM, Davidson EH, Cameron  
27 RA, Gibbs RA et al. The genome of the sea urchin *Strongylocentrotus purpuratus*. *Science*.  
28 2006;314(5801):941-52. doi:10.1126/science.1133609.  
29  
30 36. Danecek P, Auton A, Abecasis G, Albers CA, Banks E, DePristo MA et al. The variant call  
31 format and VCFtools. *Bioinformatics*. 2011;27(15):2156-8. doi:10.1093/bioinformatics/btr330.  
32  
33 37. Jo J, Oh J, Lee H-G, Hong H-H, Lee S-G, Cheon S, Kern EMA, Jin S, Cho S-J, Park J-K, Park C.  
34 Supporting data for the “Draft genome of the sea cucumber *Apostichopus japonicus* and genetic  
35 polymorphism among color variants”. *GigaScience Database*.2016. <http://dx.doi.org/10.5524/100257>.  
36  
37  
38  
39  
40  
41  
42  
43  
44  
45  
46  
47  
48  
49  
50  
51  
52  
53  
54  
55  
56  
57  
58  
59  
60  
61  
62  
63  
64  
65

**Table 1. Statistics on total reads of the *Apostichopus japonicus* genome.**

| Variants | Insertion size (bp) | Total reads*<br>(Raw data) | Total reads*<br>(w/o adaptor) | Total reads*<br>(error corrected) | % error corrected |
|----------|---------------------|----------------------------|-------------------------------|-----------------------------------|-------------------|
| Green    | 180                 | 498,608,646                | 474,117,288                   | 466,062,920                       | 1.70              |
|          | 400                 | 897,432,174                | 842,766,704                   | 831,964,242                       | 1.28              |
|          | 2000 (v1)           | 293,701,464                | 270,513,434                   | 268,573,812                       | 0.72              |
|          | 2000 (v2)           | 538,359,438                | 496,446,984                   | 493,387,418                       | 0.62              |
|          | Total               | 2,228,101,722              | 2,083,844,410                 | 2,059,988,392                     | 1.14              |
| Red      | 400                 | 397,799,042                | 394,984,810                   | 383,734,440                       | 2.85              |
| Black    | 400                 | 460,597,940                | 423,543,558                   | 416,007,614                       | 1.78              |

Note: \*The length of each read is 101 bp.

1  
2  
3  
4  
5  
6  
7  
8  
9  
10  
11  
12  
13  
14  
15  
16  
17  
18  
19  
20  
21  
22  
23  
24  
25  
26  
27  
28  
29  
30  
31  
32  
33  
34  
35  
36  
37  
38  
39  
40  
41  
42  
43  
44  
45  
46  
47  
48  
49  
50  
51  
52  
53  
54  
55  
56  
57  
58  
59  
60  
61  
62  
63  
64  
65

**Table 2. Statistics on *Apostichopus japonicus* genome assembly**

| Statistics                       | Values      |
|----------------------------------|-------------|
| Total assembled bases (bp)       | 664,375,288 |
| Average length of scaffolds (bp) | 5,010       |
| Number of scaffolds              | 132,607     |
| Number of contigs                | 197,146     |
| Length of longest scaffold (bp)  | 131,537     |
| GC content (%)                   | 35.92       |
| Scaffold N50 (bp)                | 10,488      |
| Contig N50 (bp)                  | 5,525       |
| Number of genes                  | 21,771      |
| Number of exons per gene         | 4.67        |
| Average exon length (bp)         | 209         |
| Number of introns per gene       | 4.21        |
| Average intron length (bp)       | 1,048       |



1  
2  
3  
4  
5  
6  
7  
8  
9  
10  
11  
12  
13  
14  
15  
16  
17  
18  
19  
20  
21  
22  
23  
24  
25  
26  
27  
28  
29  
30  
31  
32  
33  
34  
35  
36  
37  
38  
39  
40  
41  
42  
43  
44  
45  
46  
47  
48  
49  
50  
51  
52  
53  
54  
55  
56  
57  
58  
59  
60  
61  
62  
63  
64  
65

**Table 3. SNP and small indel statistics among three color variants.**

| Variants | # of heterozygous SNP loci | # of small indel loci |
|----------|----------------------------|-----------------------|
| Green    | 6,550,122                  | 1,662,708             |
| Red      | 14,509,713                 | 3,681,007             |
| Black    | 12,627,560                 | 3,198,584             |

1  
2 **Figure legends**  
3  
4

5  
6 **Figure 1. Three color-variants of *Apostichopus japonicus* (the green, red, and black**  
7 **variants).**  
8  
9

10  
11 **Figure 2. K-mer distribution of the *Apostichopus japonicus* genome.**  
12  
13

14  
15 **Figure 3. Schematic workflow of *Apostichopus japonicus* genome assembly and**  
16 **annotation.** The left side represents the genome assembly and the right side represents  
17 the transcriptome assembly that was performed in previous publications. To achieve  
18 suitable gene prediction, we integrated these two assembly results.  
19  
20  
21  
22  
23  
24  
25  
26  
27  
28  
29  
30  
31  
32  
33  
34  
35  
36  
37  
38  
39  
40  
41  
42  
43  
44  
45  
46  
47  
48  
49  
50  
51  
52  
53  
54  
55  
56  
57  
58  
59  
60  
61  
62  
63  
64  
65

**Author's response to reviews:****Revision version:** 2**Date:** November 11, 2016

Dear colleagues at GigaScience,

Thank you very much for handling our manuscript, "Draft genome of the sea cucumber *Apostichopus japonicus* and genetic polymorphism among color" by Jo et al., which we submitted to GigaScience. The reviewers raised important points that greatly improve our manuscript. Below, we address these points in detail one by one. The reviewers' comments are in italics. The modifications of the manuscript are shown in red.

Sincerely,

Chungoo Park  
Corresponding Author

---

**Reviewer****Comment 1:**

*We are happy to proceed to acceptance of your manuscript, but before going on with the process please include a working accession number (the bioproject PRJ number) in the manuscript.*

**Response:**

In the previous version of our manuscript, we already added the bioproject PRJ number as follow:

"The raw dataset of all *Apostichopus japonicus* genome libraries and the assembly was deposited in the NCBI database with BioProject accession number PRJNA335936, SRA accession number SRP082485, and GenBank accession number MODV00000000." (page 9)

**Comment 2:**

*You write: "Next, the reviewer commented that the number of scaffolds generated by the reviewer was slightly different from assembly statistics we present. In the manuscript, we described that the final genome assembly is composed of 132,607 scaffolds with > 1 kb. We found that there is a typo in the range. Actually, we used all scaffolds that are greater than or equal to 1 kb in length. Thus, the "> 1 kb" has been corrected to "1 kb" (page 6)."*

*I'm not sure whether I understand in how far this answers the referee's question - is the difference really caused by also including scaffolds that are exactly 1 kb, in addition to larger ones? I feel this should be more clearly explained in the manuscript ("scaffolds that are greater than or equal to 1 kb").*

**Response:**

Yes, all scaffolds are greater than or equal to 1 kb in length. To clarify it, we modified the sentence (page 6) as follow:

1 “The final genome assembly was 0.66 Gb in total length, which is about 80.5 % of the  
2 estimated genome size by flow cytometry (0.82 Gb) [14], and is composed of 132,607  
3 scaffolds and unscaffolded contigs (that are longer than or equal to 1 kb) with an N50 value  
4 of 10.5 kb (Table 2).”  
5

6 **Comment 3:**

7 *Thank you also for submitting the beautiful photos. I feel they would be quite suitable to be*  
8 *included as a figure in the manuscript itself, if you have the rights to reproduce them in an*  
9 *open access paper, but that's totally up to you.*  
10

11 **Response:**

12 We replaced our original figure 1 with the picture for homepage. And the legend of figure 1  
13 was modified as follow:  
14  
15

16 **“Figure 1. Three color-variants of *Apostichopus japonicus* (the green, red, and black  
17 variants).”**  
18  
19  
20  
21  
22  
23  
24  
25  
26  
27  
28  
29  
30  
31  
32  
33  
34  
35  
36  
37  
38  
39  
40  
41  
42  
43  
44  
45  
46  
47  
48  
49  
50  
51  
52  
53  
54  
55  
56  
57  
58  
59  
60  
61  
62  
63  
64  
65



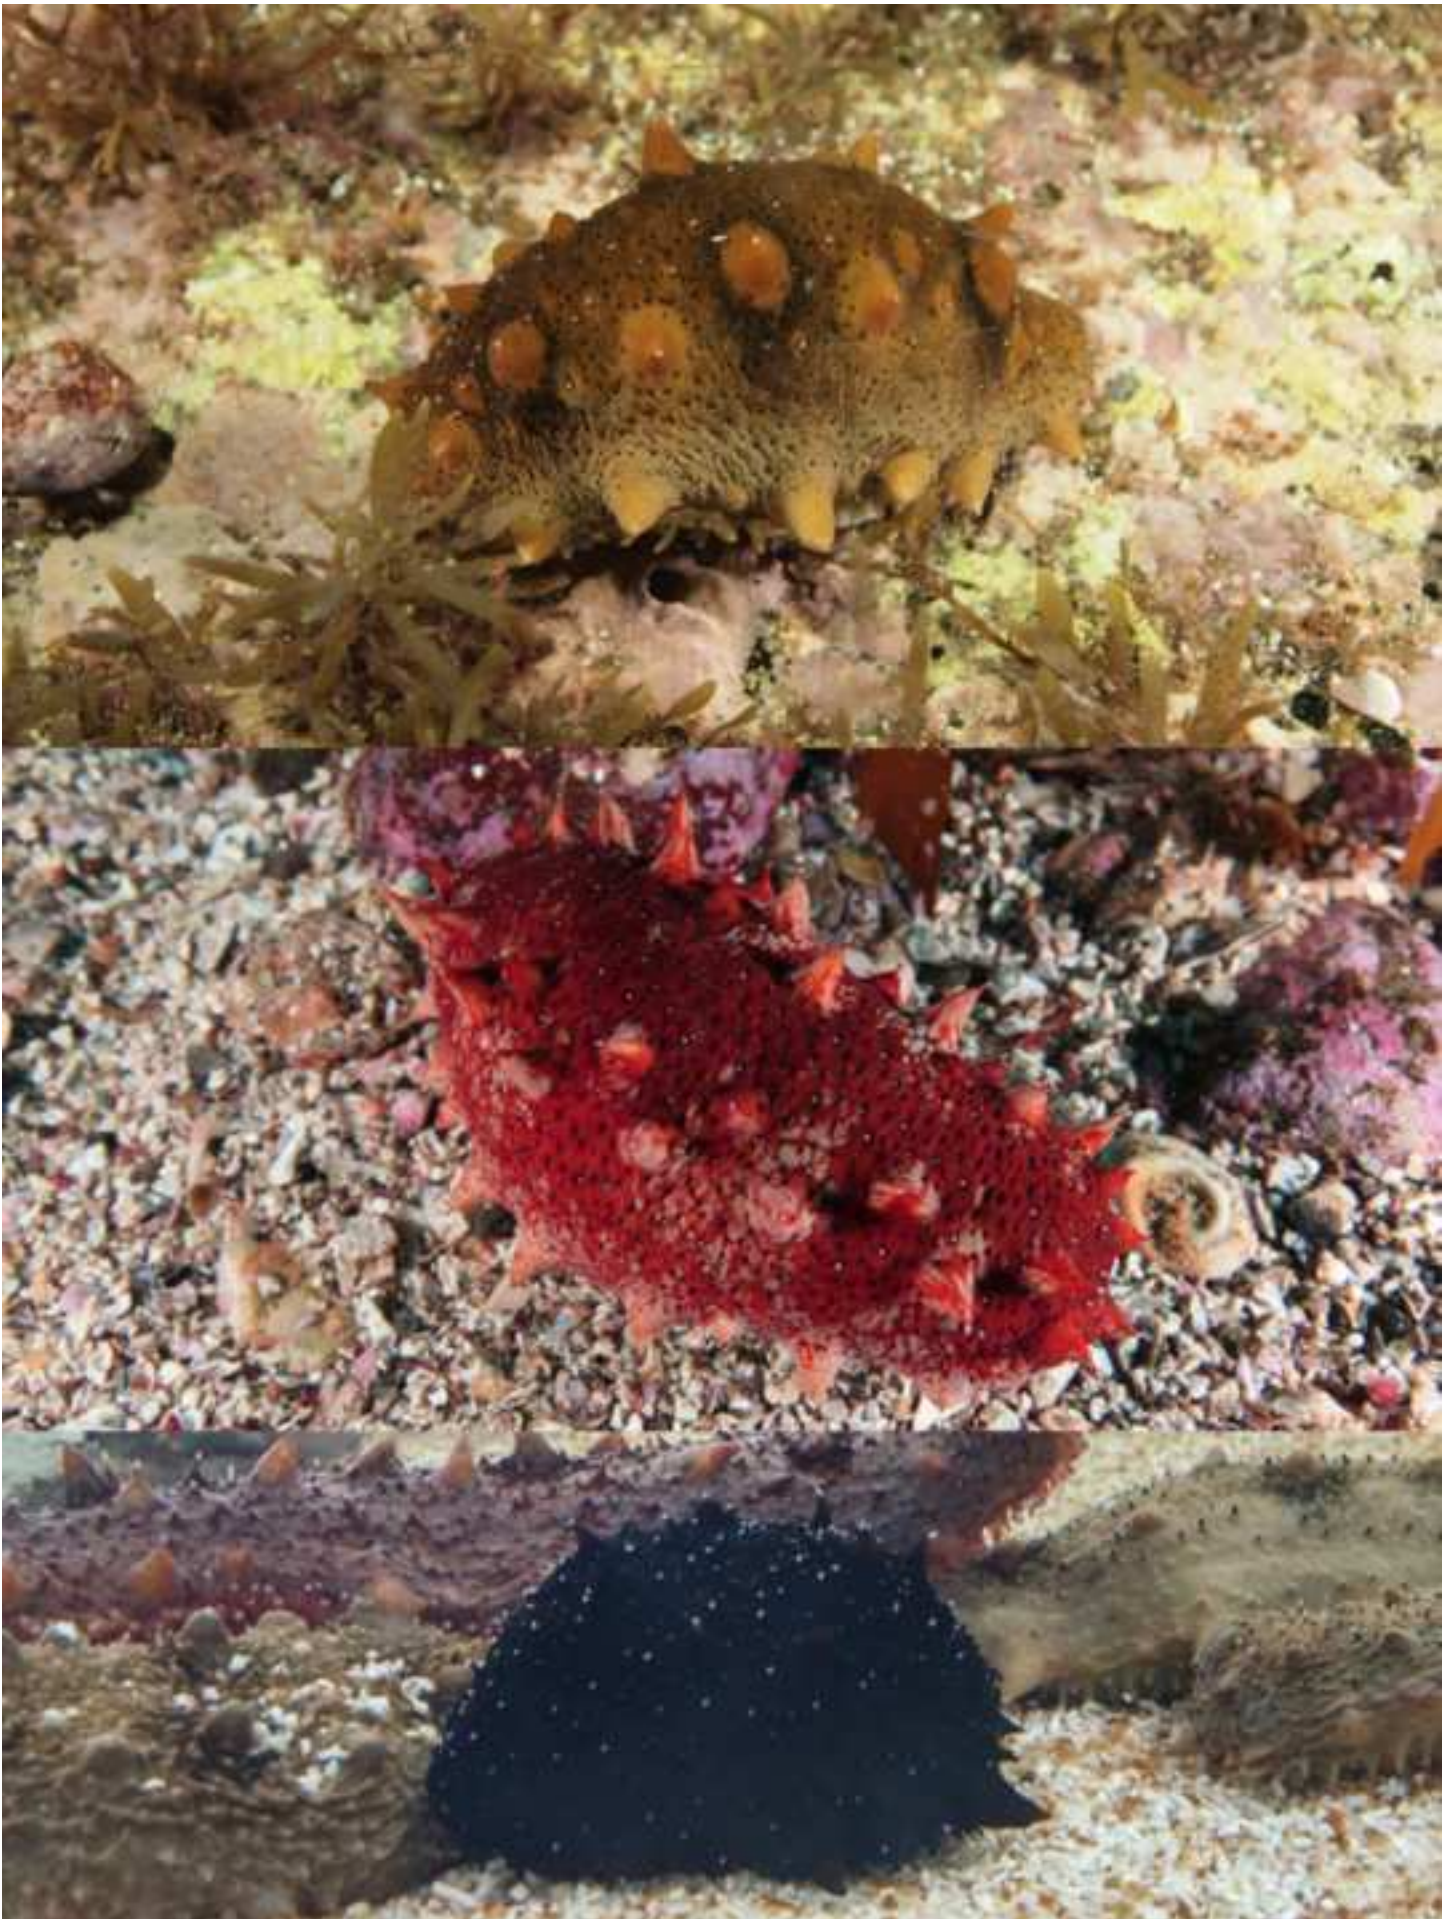

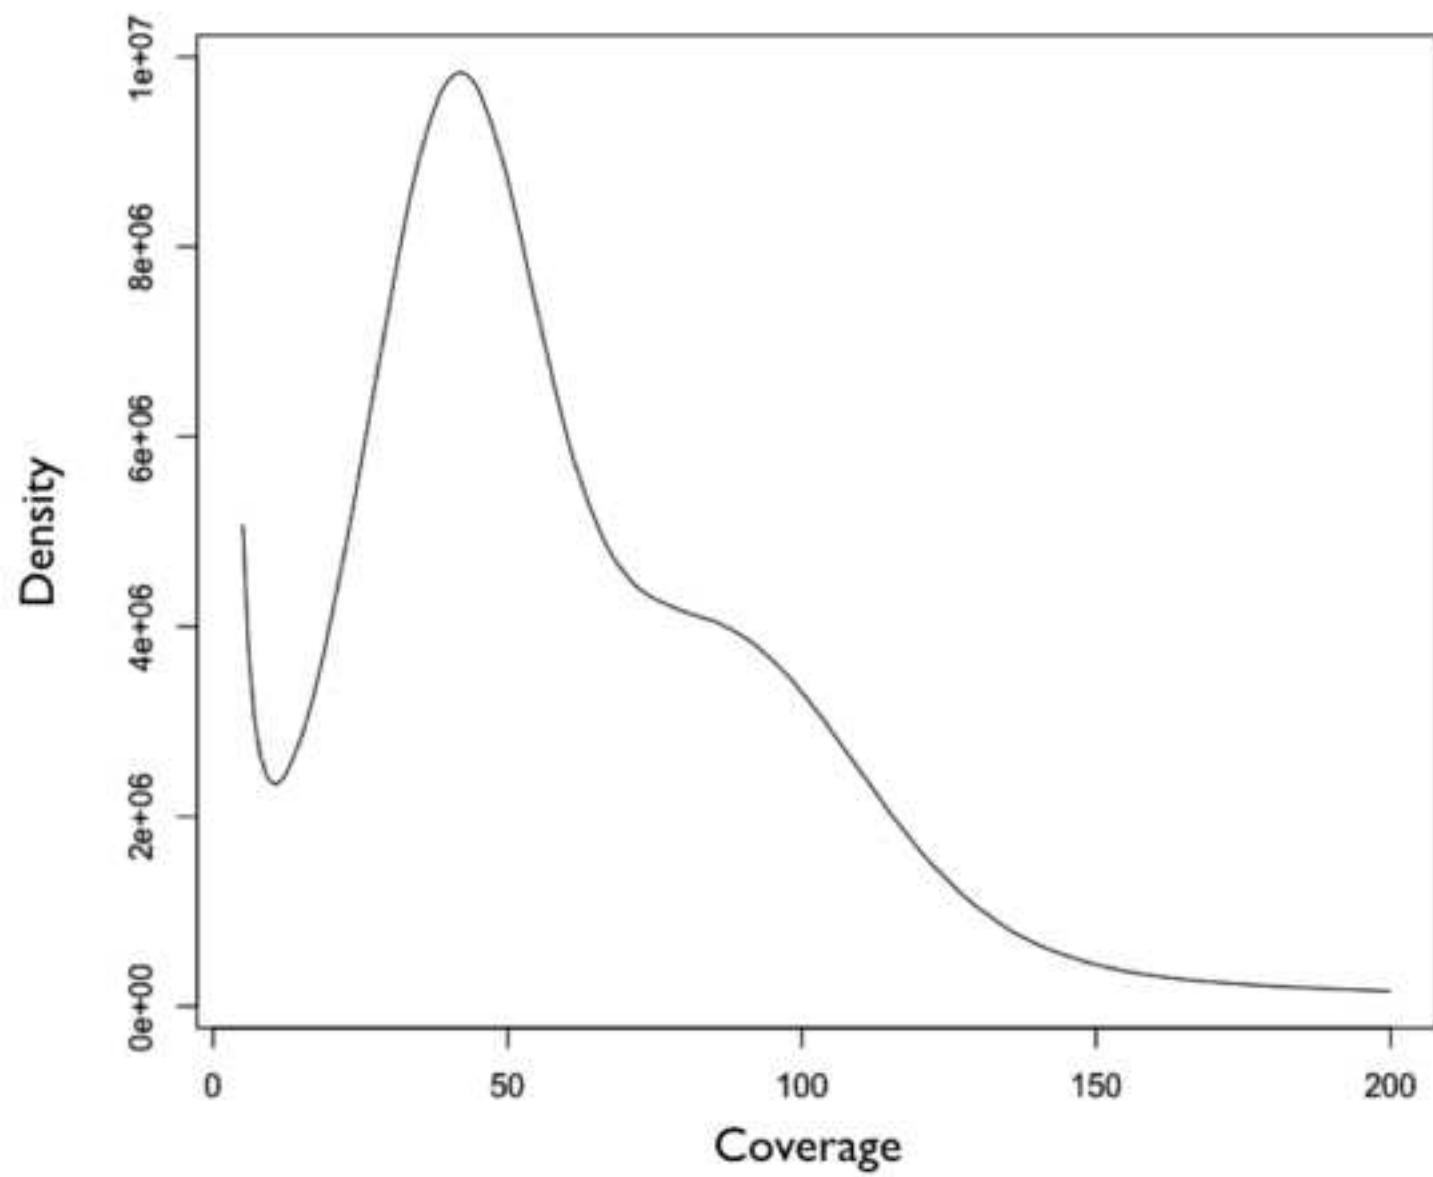

Figure 2

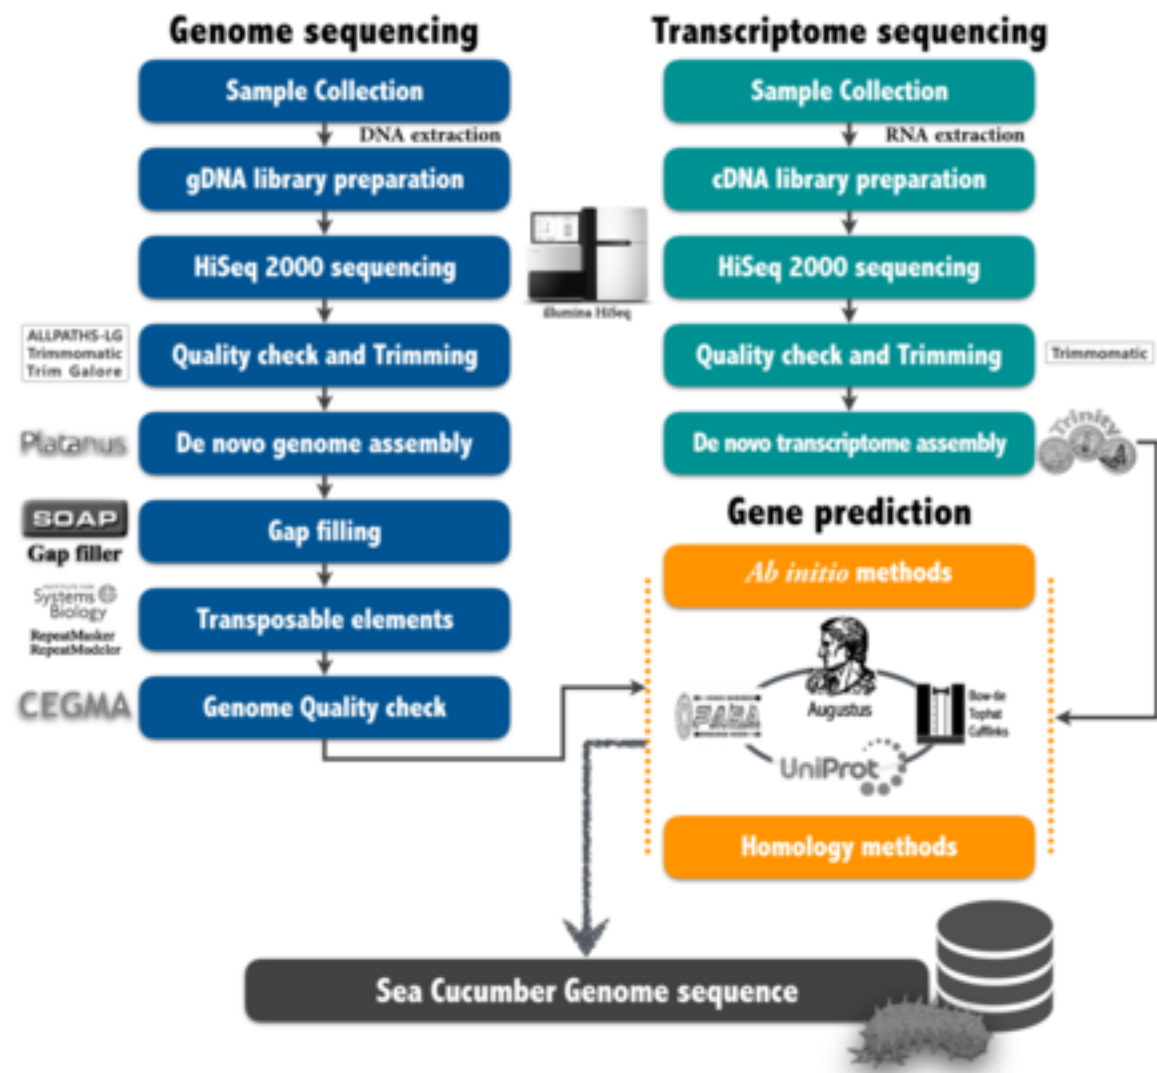

Figure 3



Click here to access/download  
**Supplementary Material**  
Table S1.docx



Sep. 1, 2016.

Dear Editor:

Please consider our manuscript entitled “**Draft genome of the sea cucumber *Apostichopus japonicus* and genetic polymorphism among color variants**” for consideration of publication as a Data note in *Gigascience*. *Apostichopus japonicus* is one of the well-known, commercially important sea cucumber species and occurs in the northwestern Pacific coast including China, Japan, Korea and the Far Eastern seas. This species exhibits a wide array of dorsal/ventral color variants (in particular green, red, and black), which differ in their biological and morphological attributes. Recently, overexploitation and the prevalence of biotic disease in sea cucumber aquaculture have generated increasing conservation concern. However, the genomic knowledge base and resources available to researchers for use in managing this natural resource or establishing genetically based breeding systems are still in a nascent stage.

We believe that our work is suitable for *Gigascience* for the following two reasons. **First**, We report the first draft genome of *A. japonicus*. A total of 312 gigabases (Gb) of raw sequences were generated using the Illumina HiSeq 2000 platform and assembled to a final size of 0.67 Gb which is about 81.7 % of the estimated genome size (0.82 Gb). We observed nucleotide-level heterozygosity within the assembled genome to be 0.986 %. The resulting draft genome assembly comprising 132,607 scaffolds with an N50 value of 10.5 kb contains a total of 21,771 predicted protein-coding genes. **Second**, we provide a general overview of the genetic variation in the three major color variants of *A. japonicus*. We identified 6.6 – 14.5 million heterozygous SNPs in the assembled genome of the three natural color variants (green, red, and black), resulting in an estimated nucleotide diversity of 0.00146. For the above reasons, we expect that our paper will help provide a comprehensive view of the genetic, physiological, and evolutionary relationships among color variants in *A. japonicus*, and will be invaluable resources for sea cucumber genomic research.

Thank you very much for considering our manuscript.

Sincerely,

Chungoo Park  
Assistant Professor of School of Biological Sciences and Technology  
Chonnam National University  
Gwangju, Republic of Korea, 500-757  
Phone: +82-62-530-1913  
Email: chungoo@jnu.ac.kr
